# Supplementary material
Source: Research Square preprint supplement (doi:10.21203/rs.3.rs-9224291/v1)
Supplement: Supplementary file 1 [file 8a92282e67113bd31241fa28.docx]

**HPLC-DAD Method for Cannabinoid Quantification in Brazilian Cannabis Oils and Extracts**

Maria Vitória dos Santos Villa Bande¹, Fernanda Vasconcelos de Almeida¹, Claudete da Costa-Oliveira2, João Gabriel Gouvea2, Ana Cristi Basile Dias¹*

¹Intitute of Chemistry, University of Brasilia - UnB, Brasilia 70910-900, Brazil

2Faculty of Medical Sciences, University of Campinas - UNICAMP, Campinas 13083-888, SP, Brazil.

*Corresponding author: acbdias@unb.br

**Supplementary materials**

Figure S1: Calibration curves, concentration (µg/mL) vs. area (a.u.), following the elution order: CBDV, CBG, CBD, THCV, CBN Δ9-THC, Δ8-THC and CBC.

**



**

**



**

**



**

**



**

Figure S2: UV absorption spectra of cannabinoid peaks recorded in the order of acquisition. mAu vs. Wavelength (nm) from 190 to 400 nm.

**
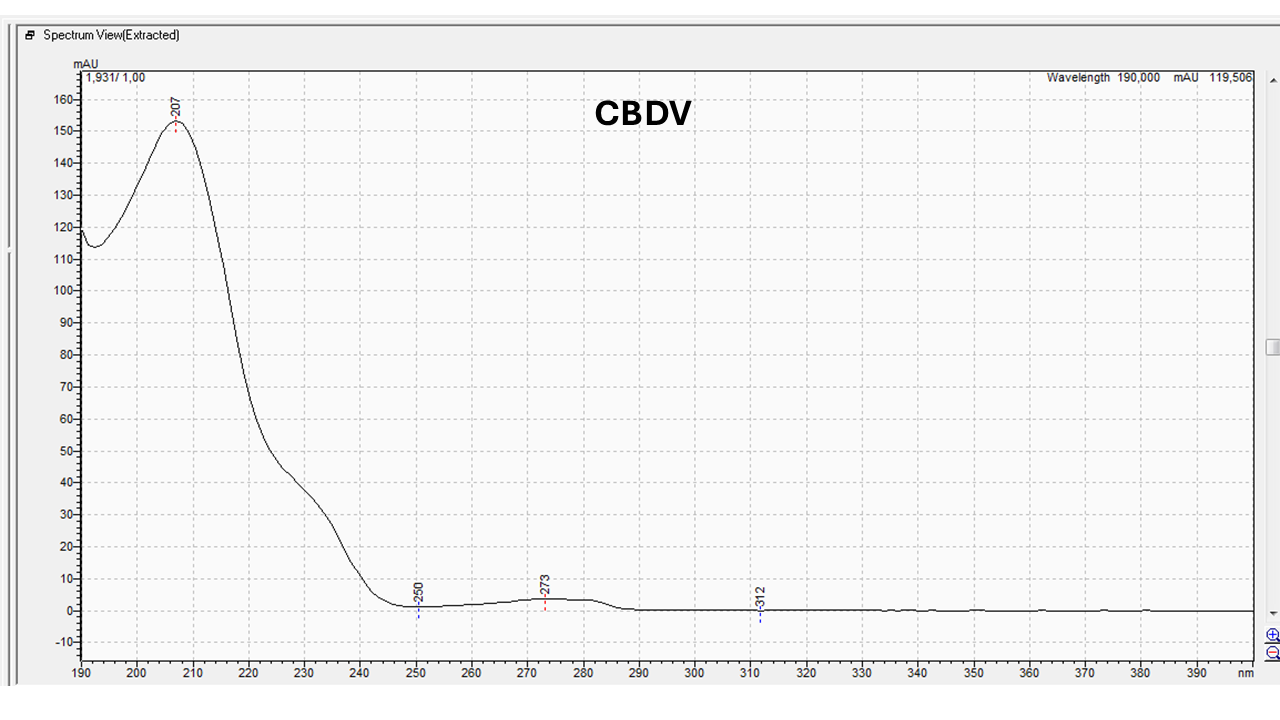
**

*
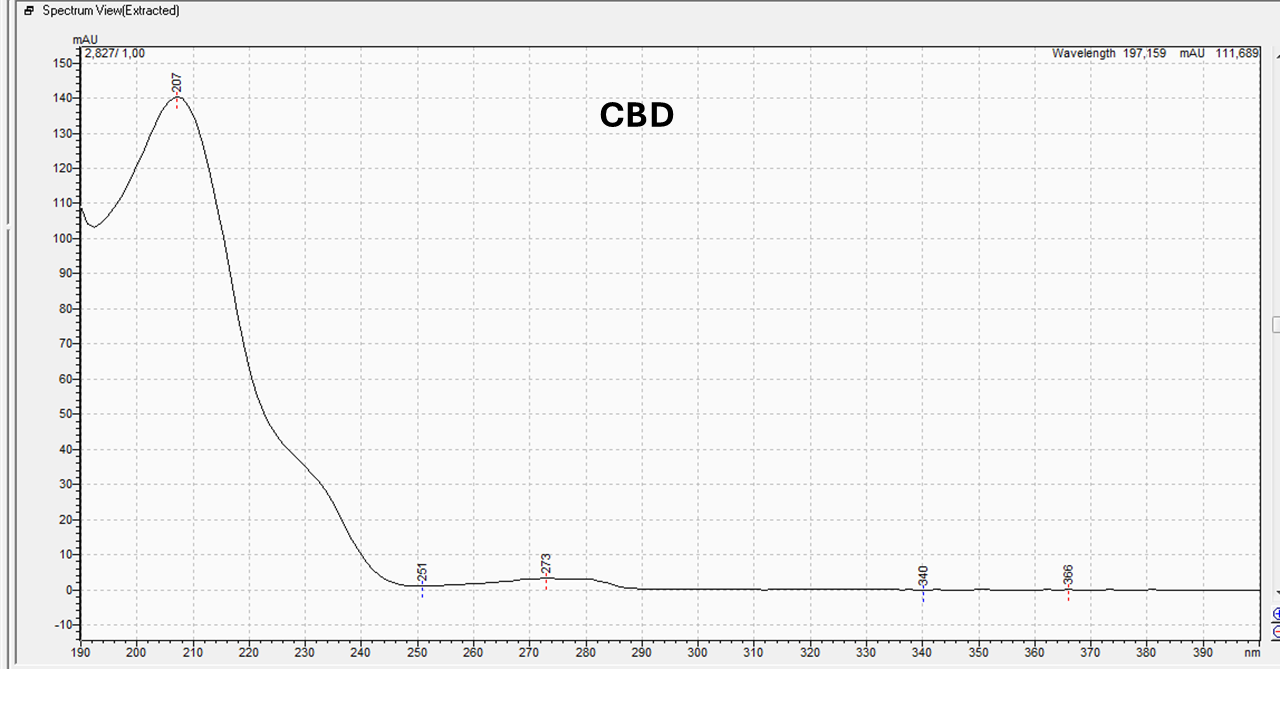

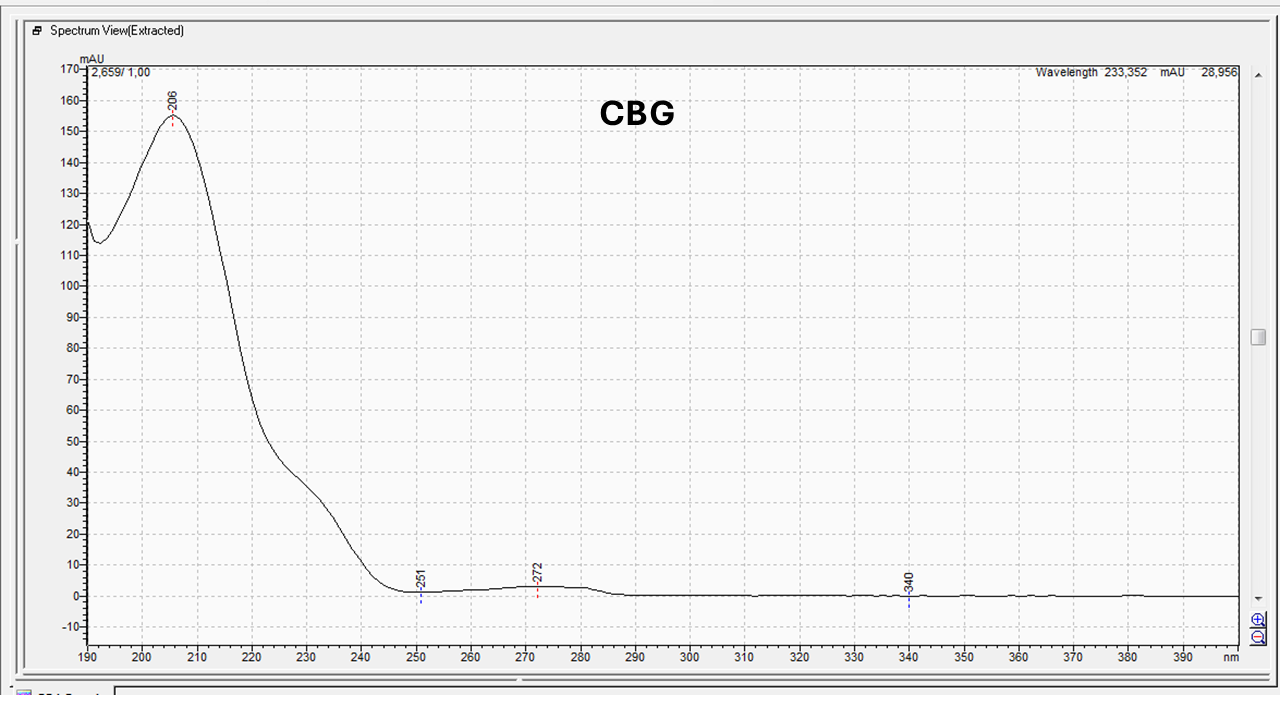
*

*
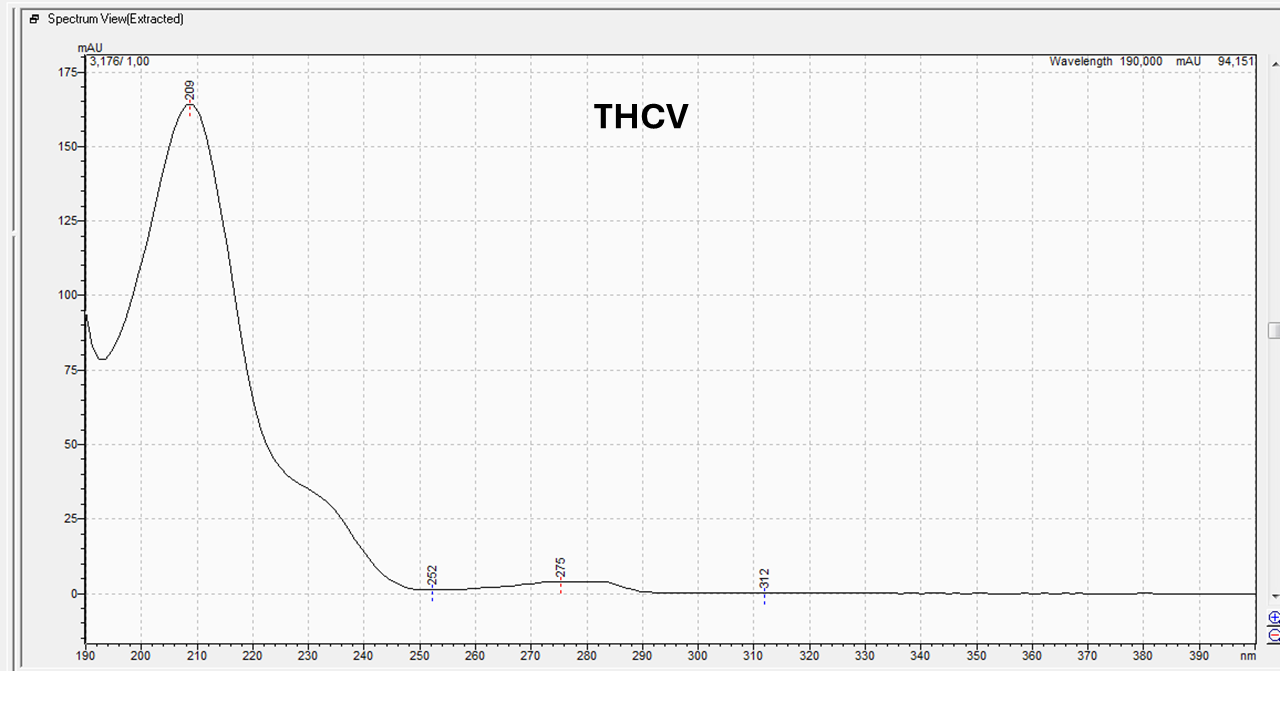
*

*
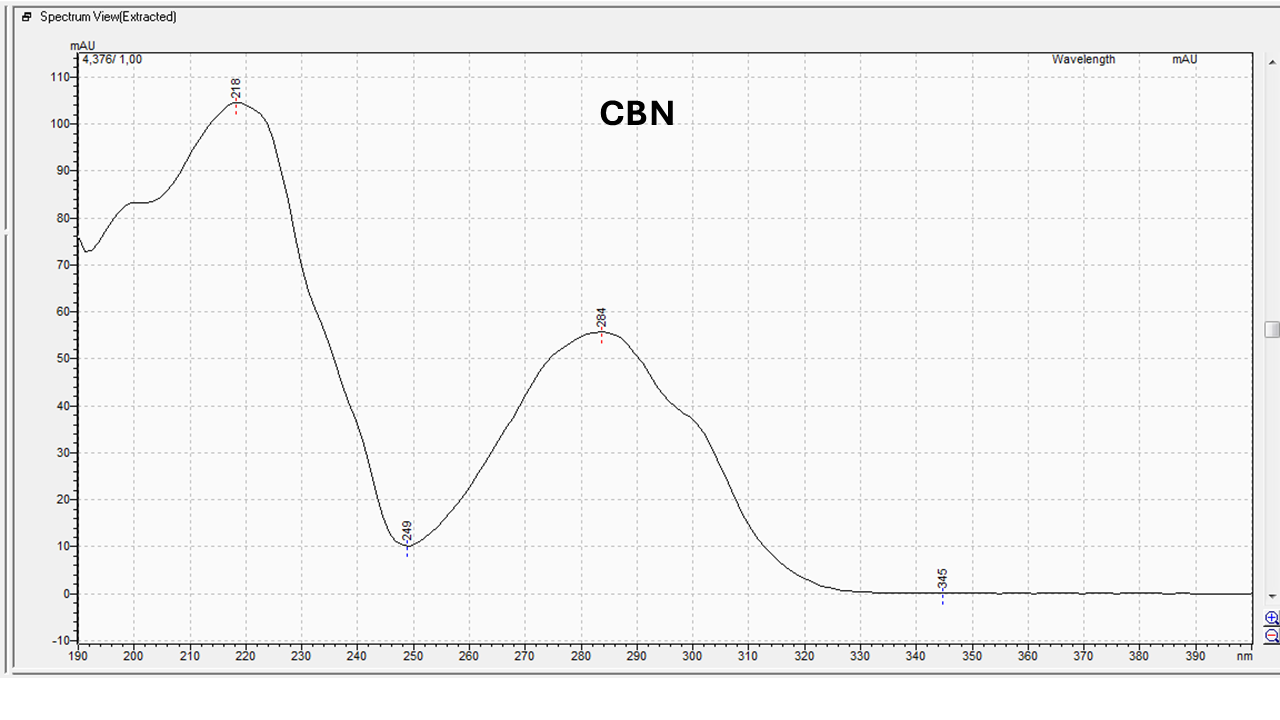
*

*
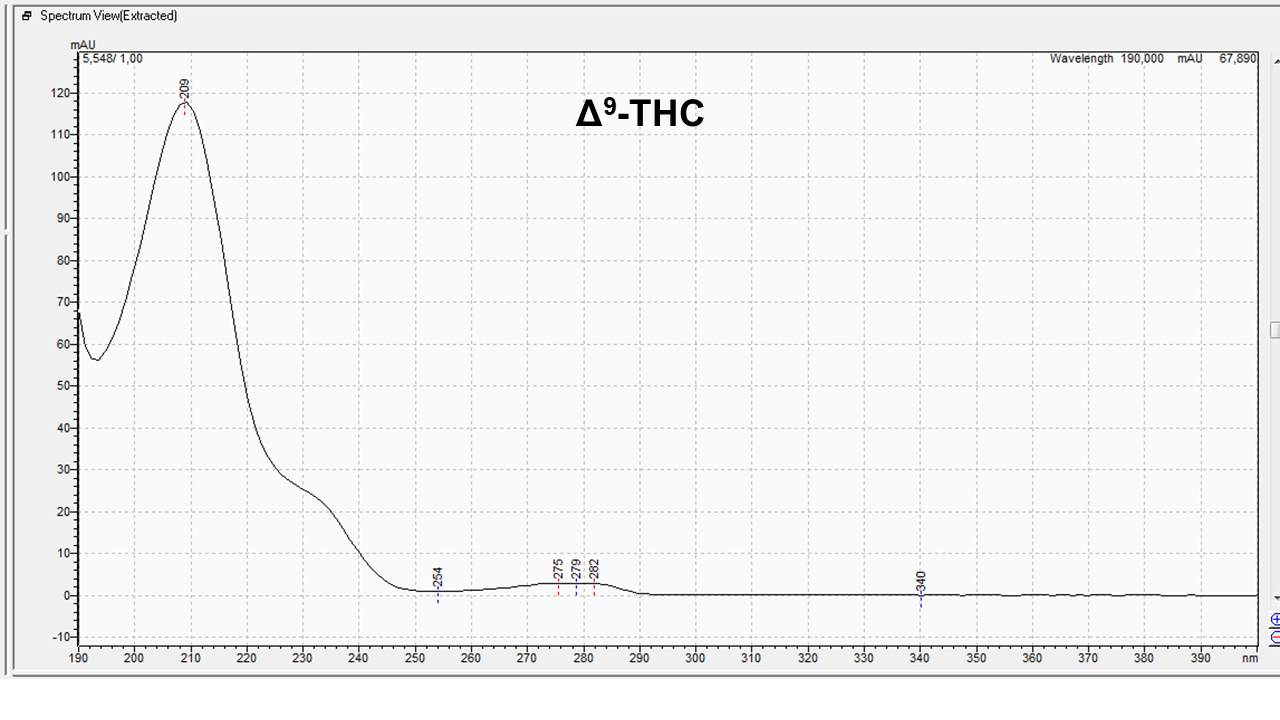
*

*
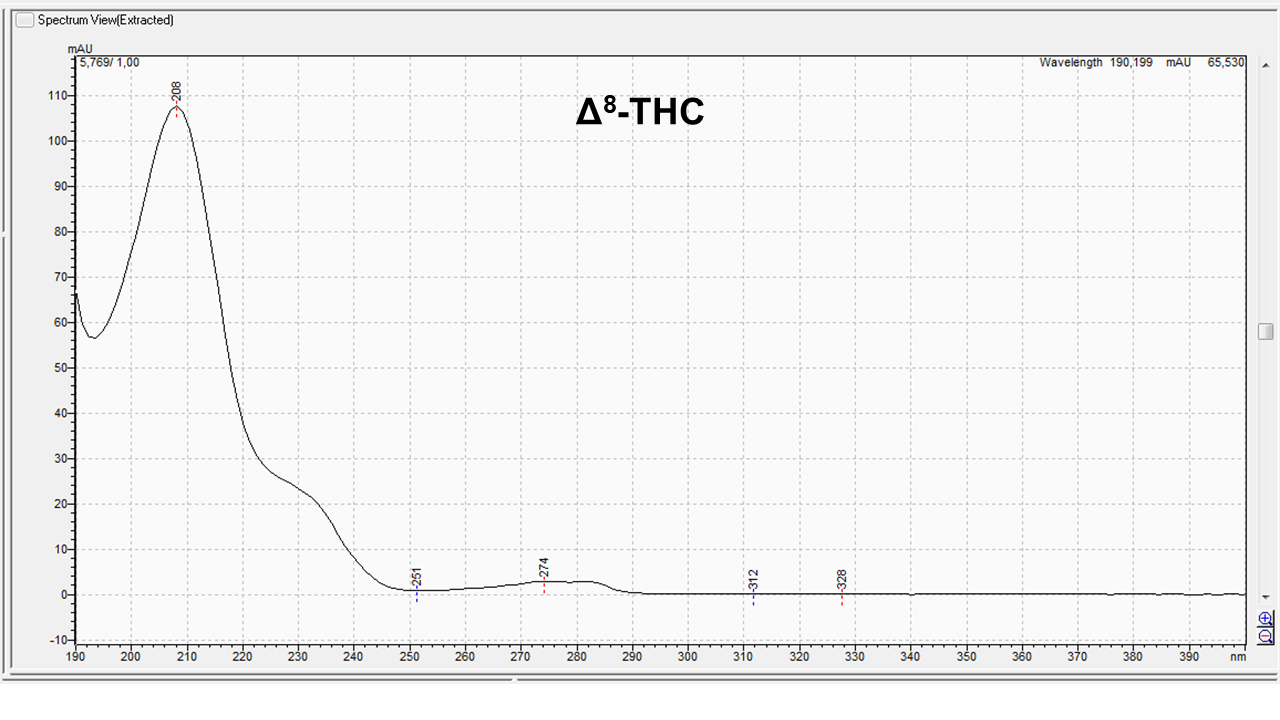
*


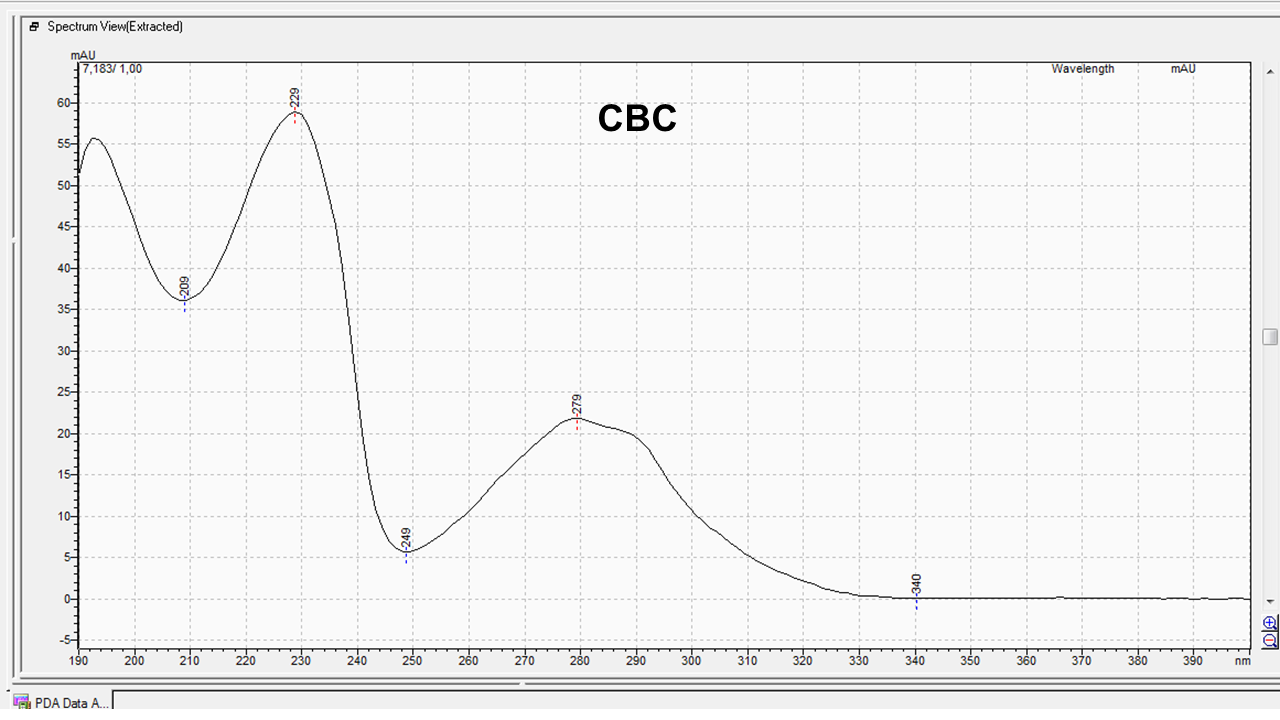


Figure S3: Chromatographic separation performed using isocratic elution: 25% (v/v) formic acid (0.01%) in water and 75% (v/v) acetonitrile at 1 mL/min. Chromatograms were recorded at 210 nm. (A) Harle Tsu oil sample (CBD strain); (B) O-CBG oil sample (CBG strain); (C) Purple Wreck oil sample (Δ9-THC strain); (D) Schanti oil sample (mixed CBD and Δ9-THC strain). Samples within the same chemotype exhibited similar elution patterns.

**

**

**

**
